# Supplementary material for: Detection of N-glycolyl-neuraminic acid-containing glycolipids in human skin
Source: Frontiers journal article supplement (doi:10.3389/fimmu.2023.1291292), 2023-11-29
Supplement: Data_Sheet_1.PDF [file Data_Sheet_1.PDF]

## **Supplementary Material**

### **Detection of N-glycolyl-neuraminic acid-containing glycolipid in human healthy skin**

Michela Manni, Natalia Rodrigues Mantuano, Andreas Zingg, Elisabeth Kappos, Anna-Janina Behrens, Jonathan Back, Rainer Follador, Amir Faridmoayer, and Heinz Läubli

## **Supplementary Methods**

### *ELISA*

Synthetic gangliosides Neu5Gc-Gm3 or Neu5Ac-GM3 (Chembind) were dissolved in methanol and coated on a 96-well polysorp plate (NUNC) overnight at room temperature. Next, wells were washed with wash buffer (PBS containing 0.05% Tween 20, PBST) before blocking with 2% BSA in PBST. After washing, antibody 14F7 was applied at a starting top concentration of 1.6ug/ml: 8000x) and incubated for 1 hour at room temperature. Detection was performed using an anti-human IgG conjugated to HRP (Jackson ImmunoResearch, Cat# 109-035-088) and revealed using substrate 3,3',5,5'-tetramethylbenzidine (TMB). Reaction was stopped by adding 2 M sulfuric acid to each well and absorbance measured at 450 nm by Synergy ELISA plate reader (Biotek).

## Supplementary Figure 1

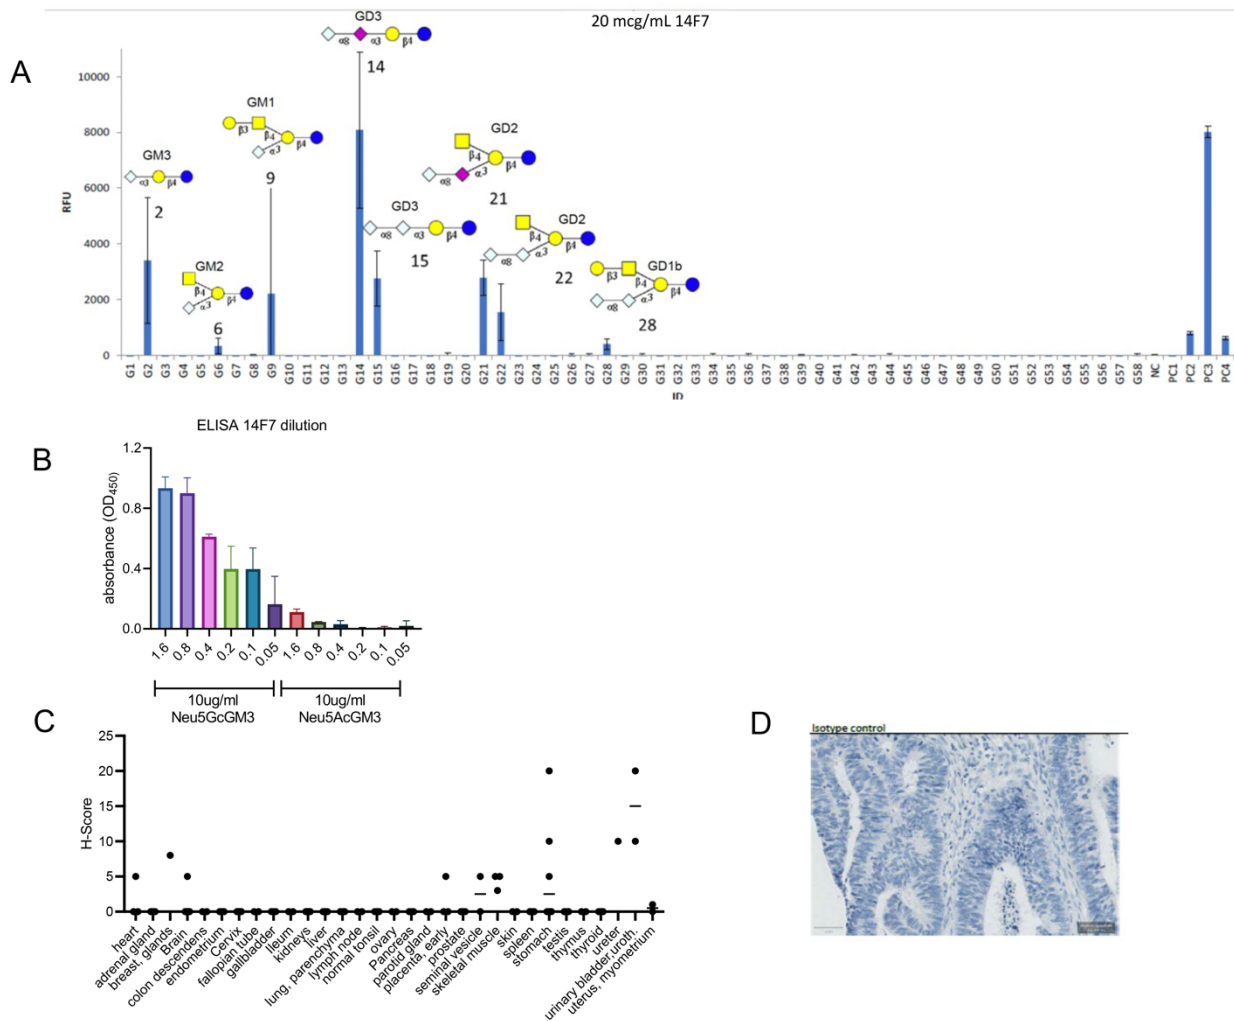

**Supplementary Figure 1: A.** 14F7 specificity for Neu5Gc-GM3 as evaluated by glycan profiling. Graph shows the 14F7 binding to GM3 and other gangliosides. **B.** 14F7 specificity for Neu5Gc-GM3 as evaluated by ELISA. Graph shows the 14F7 binding to Neu5Gc-GM3 or Neu5Ac-GM3. **C.** Neu5Gc-GM3 expression as assessed by 14F7 staining in normal tissues. Graph shows the H-score in the indicated samples. Each dot represents one TMA core. **D.** Isotype control, secondary antibody only for 14F7 staining in colorectal carcinoma.

## Supplementary Figure 2

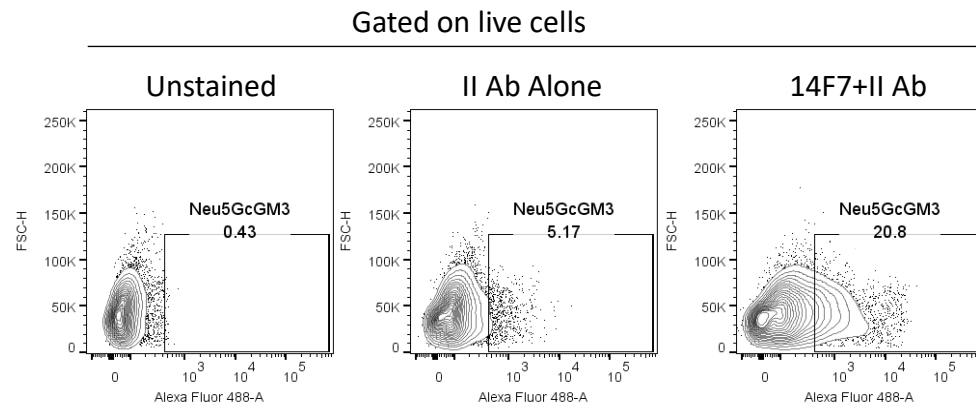

**Supplementary Figure 2:** Gating strategy used to evaluate Neu5Gc-GM3 expression in fresh human skin by flow cytometry. Unstained control and FMO control (without 14F7 but with secondary antibody) were included .
